# Supplementary material
Source: PubMed Central journal article supplement (PMC1797601)

**Electronic Appendix A.** Coefficients of variation (%) for *G. fortis* beak dimensions in each of the samples. Shown are values for all birds combined and values for mature males only (distinguished by their black plumage).

| Sample              | <u>All birds</u> |       |       | <u>Mature males</u> |       |       |
|---------------------|------------------|-------|-------|---------------------|-------|-------|
|                     | Length           | Depth | Width | Length              | Depth | Width |
| Academy 1964        | 8.8              | 12.6  | 8.9   | 8.5                 | 12.5  | 8.9   |
| Academy 1968        | 8.0              | 11.2  | -     | 7.8                 | 11.4  | -     |
| Academy 1973 (Feb.) | 9.5              | -     | 10.0  | 7.9                 | -     | 11.7  |
| Academy 1973 (Nov.) | 8.8              | 12.7  | 11.4  | 8.8                 | 11.3  | 9.4   |
| Academy 1988        | 9.3              | 14.2  | 11.9  | 7.9                 | 11.9  | 10.3  |
| Academy 1999-2002   | 8.7              | 11.9  | 10.6  | 9.4                 | 13.0  | 10.3  |
| Academy 2003        | 7.4              | 9.7   | 9.2   | 8.7                 | 11.6  | 11.1  |
| Academy 2004        | 8.3              | 11.1  | 11.0  | 8.3                 | 11.2  | 12.0  |
| Borerro 1973 (Apr.) | 5.8              | 7.7   | 6.8   | 2.7                 | 3.4   | 5.5   |
| Borerro 1973 (Dec.) | 5.7              | 7.6   | 7.2   | 5.4                 | 5.2   | 7.2   |
| Borerro 1975        | 6.8              | 7.9   | 6.4   | 6.1                 | 8.0   | 6.1   |
| Borerro 2004        | 6.9              | 10.1  | 9.0   | 7.1                 | 9.9   | 8.9   |
| El Garrapatero 2003 | 10.1             | 12.1  | 11.6  | 9.2                 | 12.2  | 11.9  |
| El Garrapatero 2004 | 8.9              | 11.9  | 11.8  | 9.3                 | 11.9  | 12.4  |
| El Garrapatero 2005 | 8.6              | 12.0  | 11.0  | 8.8                 | 12.0  | 10.9  |

**Electronic Appendix B.** Results of Bayesian mixture models for PC1 based on either beak length, depth, and width, or only beak length and depth.

| Sample              | <u>Length/depth/width</u> |                |        | <u>Length/depth</u> |                |        |
|---------------------|---------------------------|----------------|--------|---------------------|----------------|--------|
|                     | N                         | $\Delta AIC_c$ | Weight | N                   | $\Delta AIC_c$ | Weight |
| Academy 1964        | 110                       | 14.1           | >0.99  | 150                 | 27.4           | >0.99  |
| Academy 1968        | 327                       | 58.2           | >0.99  | 327                 | 58.2           | >0.99  |
| Academy 1973 (Feb.) | 35                        | 1.2            | 0.65   | -                   | -              | -      |
| Academy 1973 (Nov.) | 58                        | 4.5            | 0.90   | 58                  | 7.4            | 0.98   |
| Academy 1988        | 53                        | 6.0            | 0.95   | 53                  | 3.0            | 0.81   |
| Academy 1999-2002   | 119                       | 5.0            | 0.92   | 119                 | 5.9            | 0.95   |
| Academy 2003        | 125                       | 7.8            | 0.98   | 125                 | -3.1           | 0.17   |
| Academy 2004        | 173                       | 7.8            | 0.98   | 173                 | 4.6            | 0.91   |
| Borerro 1973 (Apr.) | 122                       | -3.1           | 0.18   | 63                  | -5.2           | 0.07   |
| Borerro 1973 (Dec.) | 72                        | -5.3           | 0.06   | 72                  | -7.8           | 0.02   |
| Borerro 1975        | 84                        | -7.8           | 0.02   | 83                  | -8.2           | 0.02   |
| Borerro 2004        | 130                       | 9.2            | 0.99   | 130                 | 3.3            | 0.84   |
| El Garrapatero 2003 | 55                        | 9.2            | 0.99   | 55                  | 5.43           | 0.94   |
| El Garrapatero 2004 | 114                       | 34.4           | >0.99  | 114                 | 30.3           | >0.99  |
| El Garrapatero 2005 | 180                       | 54.5           | >0.99  | 180                 | 47.9           | >0.99  |

**Electronic Appendix C.** Rainfall data for Academy Bay, as recorded by personnel at the Charles Darwin Research Station.

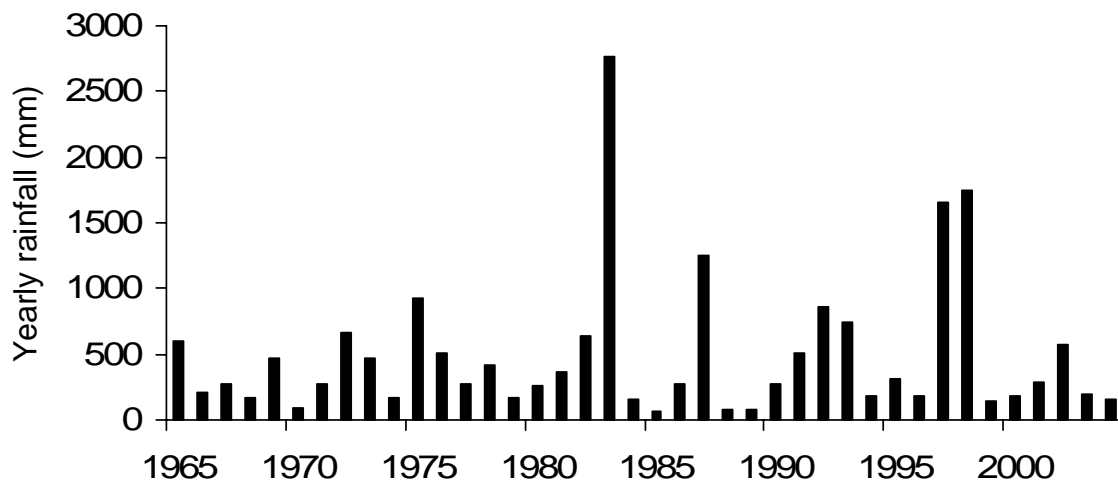

**Electronic Appendix D.** Frequency histogram for PC1 in the 1973 Borrero Bay sample.

See the caption of Fig. 3 for details.

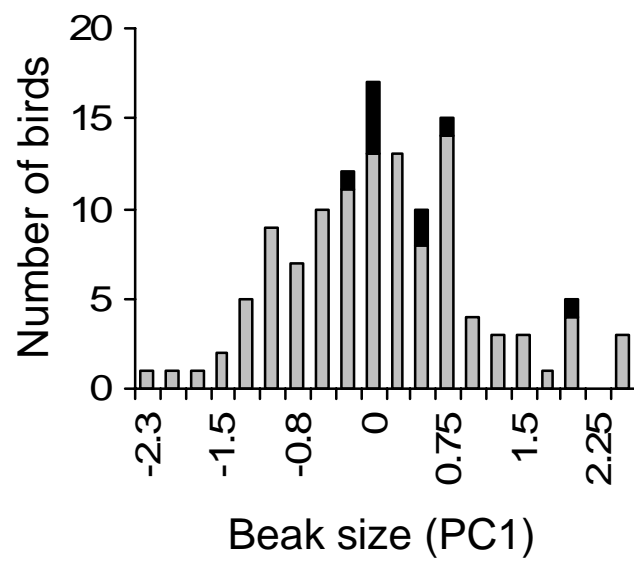

Supplement: rspb20063534s09.pdf [file rspb20063534s09.pdf]
